# Supplementary material
Source: publisher figshare collection journal article supplement (https://acs.figshare.com/ndownloader/files/7439917)
Supplement: Supplementary file 1 [file 7439917]

# Factors Governing the Host-Guest Interactions between IIA/IIB Group Metal Cations and $\alpha$ -Cyclodextrin: a DFT/CDM Study

Silvia Angelova<sup>1</sup>, Valia Nikolova<sup>2</sup>, Nevse Molla<sup>1,2</sup>, Todor Dudev<sup>2,\*</sup>

<sup>1</sup>Institute of Organic Chemistry with Centre of Phytochemistry, Bulgarian Academy of Sciences, 1113 Sofia, Bulgaria

<sup>2</sup>Faculty of Chemistry and Pharmacy, Sofia University “St. Kl. Ohridski”, 1164 Sofia, Bulgaria

## Supplementary Information

Experimental structural data from  $\text{Ca}^{2+}$  - erythritol and  $\text{Ca}^{2+}$  - lactose complexes have been used to calibrate the theoretical method employed.

### 1) $\text{Ca}^{2+}$ - erythritol complex

Erythritol ( $\text{C}_4\text{H}_{10}\text{O}_4$ ), one of the simplest representatives of carbohydrates, was chosen as a model system to study the coordination behavior of hydroxyl groups to metal ions. A mean experimental distance of 2.410 Å was calculated from the experimental  $\text{Ca-O}_{\text{erythritol}}$  distances (2.418 Å, 2.402 Å, 2.418 Å and 2.402 Å) of the X-ray structure, taken from Yang *et al.* (Figure S1):

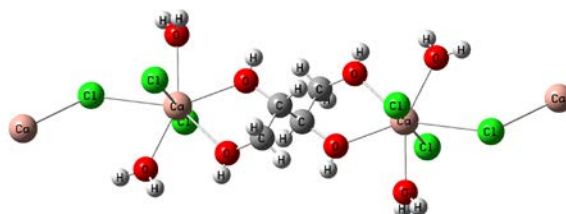

Figure S1.

In our model  $\text{Ca}^{2+}$  is coordinated to two hydroxyl groups from a single ligand molecule, two  $\text{Cl}^-$  ions and two water molecules (Figure S2):

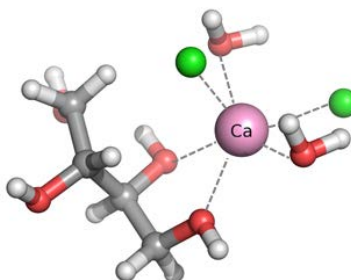

Figure S2.

Experimental and calculated mean Ca-O distances in  $\text{Ca}^{2+}$ -erythritol complexes, optimized at different levels of theory, are listed in Table S1.

**Table S1.** Experimental and calculated mean  $\text{Ca}^{2+}$ -O<sub>erythritol</sub> distances in  $\text{Ca}^{2+}$ -erythritol complex.

|                    | Ca-O <sub>erythritol</sub> distance | Exp. – calc. |
|--------------------|-------------------------------------|--------------|
| Exp. [S1]          | 2.410                               |              |
| M062X/6-31G(d,p)   | 2.405                               | 0.005        |
| M062X/6-31+G(d,p)  | 2.413                               | -0.003       |
| M062X/6-31+G(2d,p) | 2.411                               | -0.001       |
| M062X/6-311G(d,p)  | 2.374                               | 0.036        |
| M062X/6-311+G(d,p) | 2.384                               | 0.026        |
| B3LYP/6-31G(d,p)   | 2.452                               | -0.042       |
| B3LYP/6-31+G(d,p)  | 2.504                               | -0.094       |
| B3LYP/6-31+G(2d,p) | 2.470                               | -0.059       |
| B3LYP/6-311G(d,p)  | 2.422                               | -0.012       |
| B3LYP/6-311+G(d,p) | 2.434                               | -0.024       |
| HF/6-31G(d,p)      | 2.474                               | -0.064       |
| HF/6-31+G(d,p)     | 2.500                               | -0.090       |
| HF/6-31+G(2d,p)    | 2.492                               | -0.082       |
| HF/6-311G(d,p)     | 2.470                               | -0.060       |
| HF/6-311+G(d,p)    | 2.478                               | -0.068       |

## 2) $\text{Ca}^{2+}$ - lactose complex

In the hydrated calcium bromide complex of lactose (4-O- $\beta$ -D-galactopyranosyl-D-glucopyranose) the calcium ion binds to two lactose molecules and four water molecules. First lactose molecule is coordinated to the calcium ion through two oxygen atoms of its galactose moiety and the second one is coordinated through two oxygen atoms from its glucose moiety [S2]. In our model complex calcium ion binds to one galactose molecule, one glucose molecule and four water molecules (Figure S3). Thus, the calcium ion is surrounded by a similar shell, composed of eight oxygen atoms: four from water molecules and four from glucose/galactose hydroxyl groups. The M062X/6-31G(d,p) calculated Ca-O<sub>lactose</sub> mean distance, 2.506 Å, is very close to the experimental one of 2.500 Å.

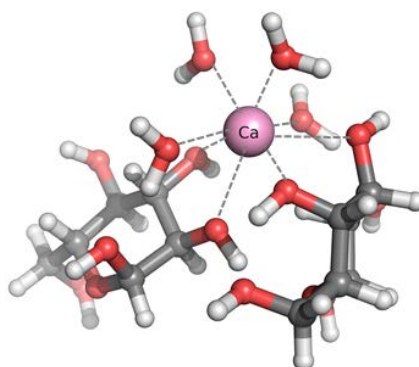

**Figure S3.**

**Table S2.** Thermodynamic parameters (in kcal/mol) in the gas-phase (superscript 1) and water environment (superscript 78) calculated for the metal complex formation reaction,  $\alpha\text{CD} + \text{M}^{2+} \rightarrow [\alpha\text{CD-M}]^{2+}$ .

| metal cation     | Full optimization        |              |               |              |                 | Partial optimization (metal frozen) |              | Partial optimization ( $\alpha\text{CD}$ frozen) |              |
|------------------|--------------------------|--------------|---------------|--------------|-----------------|-------------------------------------|--------------|--------------------------------------------------|--------------|
|                  | $\Delta E_{\text{el}}^1$ | $\Delta H^1$ | $T\Delta S^1$ | $\Delta G^1$ | $\Delta G^{78}$ | $\Delta E_{\text{el}}^1$            | $\Delta G^1$ | $\Delta E_{\text{el}}^1$                         | $\Delta G^1$ |
| $\text{Be}^{2+}$ | -446.9                   | -447.3       | -12.5         | -434.8       | -119.6          | -195.2                              | -182.7       | -286.8                                           | -274.7       |
| $\text{Mg}^{2+}$ | -306.0                   | -306.1       | -12.3         | -293.8       | -32.9           | -161.3                              | -149.0       | -211.0                                           | -198.8       |
| $\text{Ca}^{2+}$ | -226.0                   | -226.7       | -9.7          | -217.0       | -9.4            | -135.3                              | -125.6       | -182.2                                           | -173.2       |
| $\text{Sr}^{2+}$ | -183.8                   | -182.5       | -12.2         | -170.3       | 13.4            | -109.7                              | -97.5        | -156.6                                           | -143.1       |
| $\text{Ba}^{2+}$ | -165.7                   | -165.0       | -11.7         | -153.3       | 22.8            | -91.6                               | -79.9        | -137.0                                           | -124.5       |
| $\text{Zn}^{2+}$ | -353.3                   | -353.4       | -12.7         | -340.8       | -44.8           | -183.0                              | -170.3       | -237.9                                           | -225.4       |
| $\text{Cd}^{2+}$ | -277.4                   | -277.9       | -11.4         | -266.6       | 13.0            | -164.1                              | -152.7       | -204.4                                           | -193.5       |
| $\text{Hg}^{2+}$ | -284.7                   | -286.0       | -10.9         | -275.1       | 33.6            | -184.2                              | -173.3       | -217.8                                           | -208.2       |

## References

- [S1] Yang, L.; Su, Y.; Xu, Y.; Wang, Z.; Guo, Z.; Weng, S.; Yan, C.; Zhang, S.; Wu, J. Interactions between Metal Ions and Carbohydrates. Coordination Behavior of Neutral Erythritol to Ca(II) and Lanthanide Ions, *Inorg. Chem.* **2003**, 42, 5844–5856.
- [S2] Bugg, C. E. Calcium Binding to Carbohydrates. Crystal Structure of a Hydrated Calcium Bromide Complex of Lactose, *J. Amer. Chem. Soc.*, **1973**, 95, 908-913.
